# Supplementary material for: Influence of time and ageing conditions on the properties of ferrihydrite
Source: Royal Society of Chemistry journal article supplement (doi:10.1039/d3en00828b), 2024-01-01
Supplement: d3en00828b1.pdf [file d3en00828b1.pdf]

## Supplementary Information for

### Influence of Time and Ageing Conditions on the Properties of Ferrihydrite

Michel Sassi<sup>1</sup>, Odeta Qafoku<sup>2</sup>, Mark E. Bowden<sup>2</sup>, Carolyn I. Pearce<sup>1</sup>, Drew Latta<sup>3</sup>, Quin R. S. Miller<sup>1</sup>, Mavis D. Boamah<sup>1</sup>, Alpha T. N'Diaye<sup>4</sup>, Jade E. Holliman Jr.<sup>1</sup>, Elke Arenholz<sup>1</sup>, Kevin M. Rosso<sup>1\*</sup>

<sup>1</sup>Pacific Northwest National Laboratory, Richland, WA 99352, United States

<sup>2</sup>Environmental Molecular Sciences Laboratory, Pacific Northwest National Laboratory, Richland, WA 99352, United States

<sup>3</sup>Department of Civil and Environmental Engineering, University of Iowa, Iowa City, Iowa 52242, United States

<sup>4</sup>Advanced Light Source, Lawrence Berkeley National Laboratory, Berkeley, California 94720, United States

\*E-mail: [Kevin.Rosso@pnnl.gov](mailto:Kevin.Rosso@pnnl.gov)

## CONTENT

|                                                                                                       |     |
|-------------------------------------------------------------------------------------------------------|-----|
| Methods of ferrihydrite synthesis under different atmosphere                                          | P2  |
| Additional Methods for Total Inorganic Carbon (TIC) analysis                                          | P2  |
| Table S1: TIC and pH variations as a function of synthesis condition, aging condition, and time       | P3  |
| Figure S1: pH variations vs ageing time                                                               | P4  |
| Figure S2: pH variation vs ageing time and conditions                                                 | P4  |
| Figure S3: Measured and calculated TIC (CO <sub>2</sub> ) in 20 g/L Fh suspensions                    | P5  |
| Figure S4: pH and TIC content of 20 g/L ferrihydrite suspension                                       | P5  |
| Figure S5: SEM images vs ageing time                                                                  | P6  |
| Figure S6: TGA-MS of reference goethite                                                               | P6  |
| Figure S7: Evolution of O K-edge vs ageing time                                                       | P7  |
| Figure S8: TGA-MS and CO <sub>2</sub> measurements of Fh synthesized and aged in different conditions | P8  |
| Figure S9: Fe L-edge XMCD and LCF fits vs ageing time                                                 | P9  |
| Figure S10: LCF of Fe L-edge XMCD and O K-edge XANES of fresh Fh samples                              | P9  |
| Figure S11: Comparison of fresh Fe L-edge XMCD spectra and LCF as function of conditions              | P10 |
| References                                                                                            | P11 |

## Methods of ferrihydrite synthesis under different atmosphere

**Ferrihydrite synthesis.** Ferrihydrite (Fh) was synthesized according to procedures described in the main text, except that separate batches of Fh were synthesized in normal atmosphere (aerobic) and inside an anaerobic glovebox (anaerobic). Briefly, a solution of 100 mM  $\text{FeCl}_3 \cdot 6\text{H}_2\text{O}$  was prepared in deionized water and stirred. Care was taken to minimize contamination of NaOH with carbonate. To do this, a solution of 50% NaOH was prepared and allowed to stand to precipitate less soluble  $\text{Na}_2\text{CO}_3$ . This solution was filtered using a 0.45  $\mu\text{m}$  polypropylene syringe filter prior to dilution to approximately 2 M and 0.2 M NaOH. New dilutions of NaOH were prepared each day for use from freshly dispensed deionized water. Fh was precipitated from  $\text{FeCl}_3$  solution by adding 2 M NaOH dropwise until pH 5.0 and 0.2 M NaOH until pH 7.0 to 7.2 was reached. The Fh suspension was centrifuged and washed three times with deionized water and stored as a suspension of  $\sim 200$  mM Fe ( $\sim 20$  g/L). This procedure was repeated in an anaerobic glovebox with 95%  $\text{N}_2$ /5%  $\text{H}_2$  atmosphere maintained to  $<5$  ppm  $\text{O}_2$  with a Pt  $\text{O}_2$  removing catalyst. Washing was done inside the anaerobic glovebox with  $\text{N}_2$ -sparged deionized water.

## Methods for Total Inorganic Carbon Analysis.

**Total inorganic carbon measurements.** The total inorganic carbon concentration (TIC = dissolved carbon dioxide and carbonate species) was measured using the TIC apparatus of a Shimadzu TOC-V instrument and a liquid autosampler. Aliquots of ferrihydrite suspensions were placed in EPA VOA vials and sealed with parafilm and analyzed immediately after preparation. The whole ferrihydrite suspension TIC was measured by injection of 250 to 500  $\mu\text{L}$  aliquots, depending on assumed TIC concentration, into a 25% v/v phosphoric acid solution in deionized water. During the sparging and measurement of TIC the ferrihydrites were observed to dissolve into the phosphoric acid solution. TIC concentrations were standardized with dilutions of a 1,000 mg/L TIC bicarbonate-carbonate buffer (500 mg/L of  $\text{NaHCO}_3$  and 500 mg/L  $\text{Na}_2\text{CO}_3$ ) with a standard curve to 20 mg/L TIC. Blanks were acidified with 500  $\mu\text{L}$  0.1M HCl and sparged with 99.999%  $\text{N}_2$  gas. Diluent solutions were first sparged with 99.999%  $\text{N}_2$  gas to remove dissolved  $\text{CO}_2$ . Analysis of a batch of air synthesized and air aged ferrihydrite was done to quantify analytical variability ( $1\sigma$ ) due to the non-standard measurement of TIC of suspended particles. Analysis of six aliquots of the suspension yielded TIC of  $0.82 \pm 0.0077$  mmole  $\text{C L}^{-1}$  suggesting that the variability in the measurement is due to batch-to-batch variability rather than instrumental variability.

Differences in suspension TIC were evaluated using two-factor ANOVA with replication in Microsoft Excel as a function of both synthesis condition and aging condition. Data at one day and approximately two weeks were taken together given little difference in TIC over this time period (**Table S1**).

**TIC removal and pH change during sparging.** The loss of TIC and change in pH of a suspension of ferrihydrite was measured by sparging 20 mL of ferrihydrite suspension with 150 mL/min of 99.999%  $\text{N}_2$  gas. The pH was monitored for 260 minutes and aliquots of the initial suspension and final suspension were used for TIC measurement.

| Synthesis condition | Aging condition | Batch | Aging time (days) | pH   | Suspension TIC (mmoles C L <sup>-1</sup> ) |
|---------------------|-----------------|-------|-------------------|------|--------------------------------------------|
| Air                 | Air             | 1     | 1                 | 4.72 | 1.36                                       |
|                     |                 | 1     | 16                | 4.81 | 1.12                                       |
|                     |                 | 1     | 42                | 5.37 | 1.42                                       |
| Air                 | Air             | 2     | 1                 | 4.71 | 0.54                                       |
|                     |                 | 2     | 12                | 4.67 | 0.56                                       |
| Air                 | Air             | 3     | 41                | -    | 0.82 ± 0.008†                              |
| Air                 | Glovebox        | 1     | 1                 | 4.92 | 1.36                                       |
|                     |                 | 1     | 15                | 5.30 | 0.80                                       |
|                     |                 | 1     | 41                | 5.12 | 0.89                                       |
| Air                 | Glovebox        | 2     | 0                 | 4.46 | 0.94                                       |
|                     |                 | 2     | 9                 | 4.41 | 0.92                                       |
| Glovebox            | Glovebox        | 1     | 9                 | 5.12 | 0.33                                       |
|                     |                 | 1     | 34                | 5.05 | 0.44                                       |
| Glovebox            | Glovebox        | 2     | 2                 | 4.73 | 0.33                                       |
|                     |                 | 2     | 13                | 4.78 | 0.35                                       |
| Glovebox            | Air             | 1     | 8                 | 5.46 | 0.45                                       |
|                     |                 | 1     | 33                | 5.50 | 0.55                                       |
| Glovebox            | Air             | 2     | 2                 | 4.70 | 0.27                                       |
|                     |                 | 2     | 11                | 5.01 | 0.41                                       |

**Table S1:** Effect of synthesis and aging conditions on total suspension inorganic carbon (TIC) in ferrihydrite suspensions. †Analysis of a third batch of air synthesized and air aged ferrihydrite was done to quantify analytical variability ( $1\sigma$ ) due to the non-standard measurement of suspended Fh particles with TIC analysis.

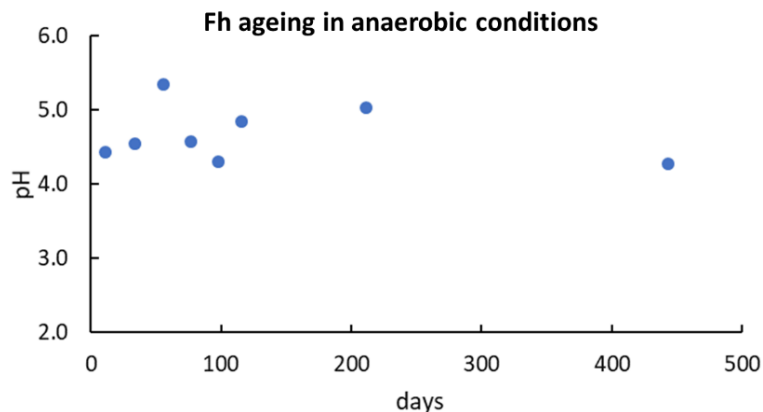

**Figure S1:** Time-evolution of the pH as function of Fh ageing under anaerobic conditions.

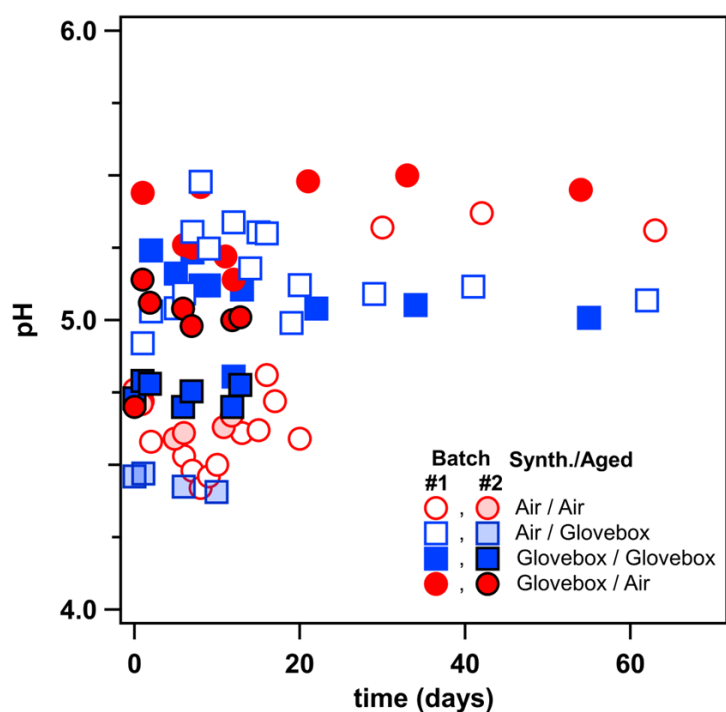

**Figure S2:** Measured pH of ferrihydrite suspensions of ~20 g/L ferrihydrite as a function of time, synthesis conditions, and aging conditions. The difference in marker types of open markers and light shading and filled markers and black borders representing Batch 1 and Batch 2, respectively. Air/Air denotes that the ferrihydrite was synthesized in air and aged in air, Air/Glovebox denotes that the ferrihydrite was synthesized in air and aged inside an anoxic glovebox with 93% N<sub>2</sub>/7% H<sub>2</sub> atmosphere with <1 ppm O<sub>2</sub>.

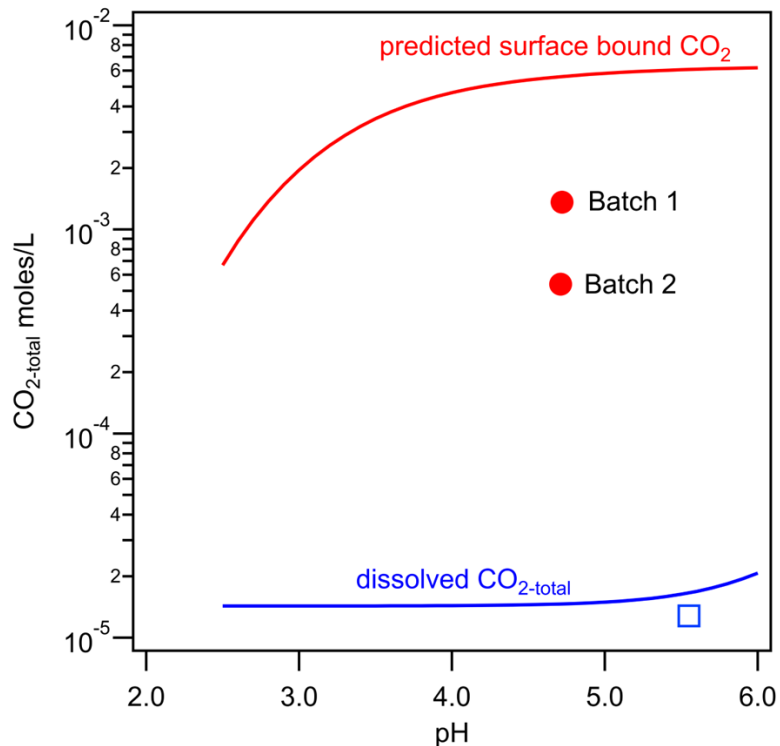

**Figure S3:** Dissolved and surface-bound CO<sub>2</sub> species calculated for 420 ppm CO<sub>2</sub> and 20 g/L ferrihydrite loadings. Calculations were done in Visual MINTEQ using the Dzombak and Morel Double Layer Model<sup>1</sup> and surface complexation data from Zachara *et al.*<sup>2</sup> and Appelo *et al.*<sup>3</sup> Red markers reflect the measured TIC for air synthesized-air aged ferrihydrite batches (Table S1), and the blue marker represents the pH and TIC content of air-saturated water measured in the laboratory.

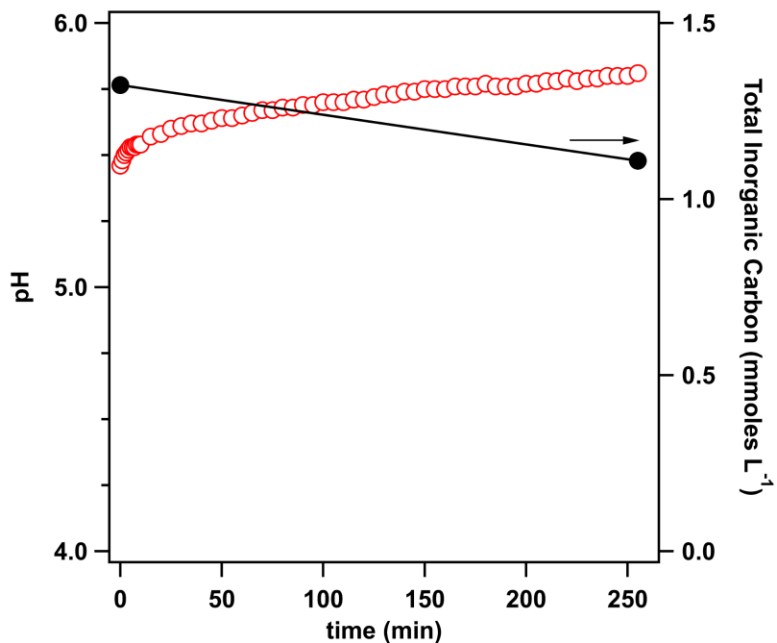

**Figure S4:** pH and TIC content of 20 g/L ferrihydrite suspension during sparging with 99.999% N<sub>2</sub> gas over three hours.

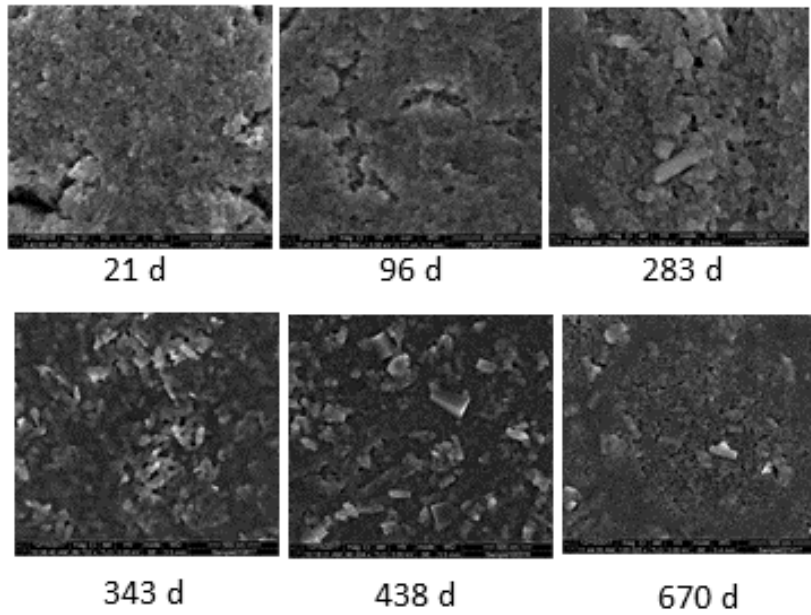

Figure S5: SEM images of Fh ageing synthesized in aerobic and aged in anaerobic conditions.

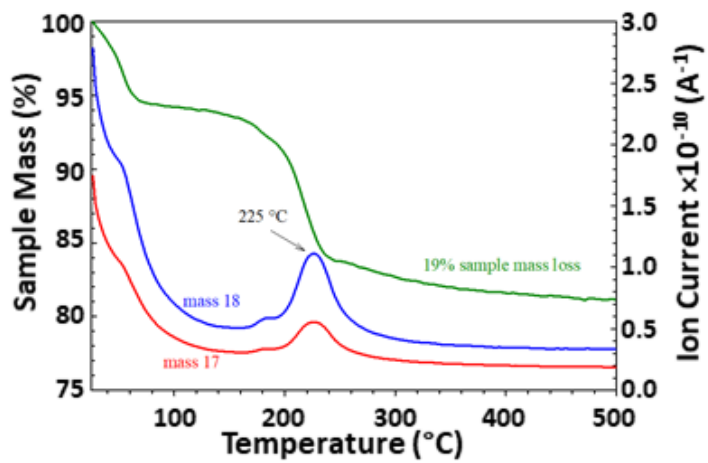

Figure S6: TGA-MS results for the reference goethite sample.

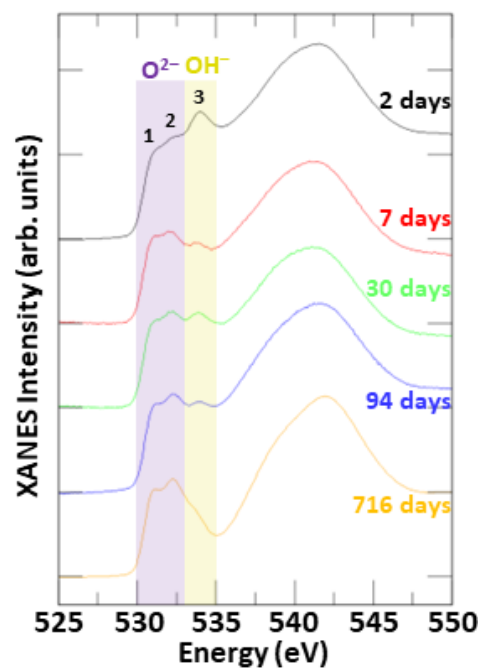

**Figure S7:** O K-edge spectra of Fh synthesized in aerobic and aged in anaerobic conditions as function of ageing. The energy regions associated to OH<sup>-</sup> and O<sup>2-</sup> have been highlighted.

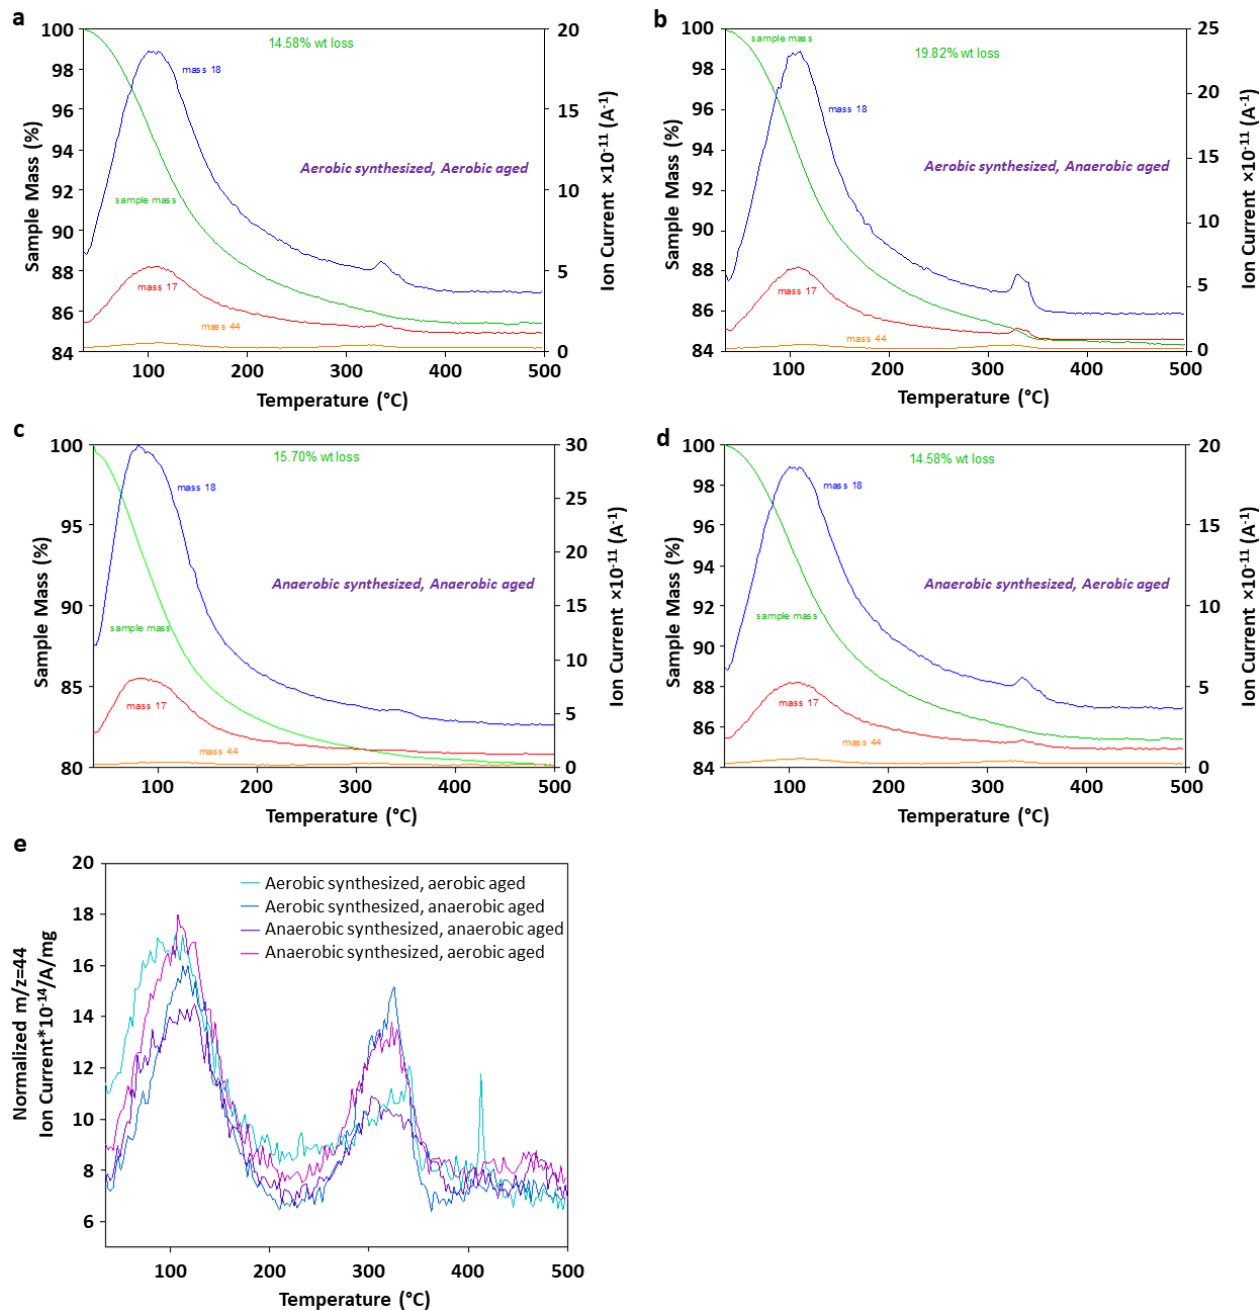

**Figure S8:** (a-d) TGA-MS measurements conducted on (~7-14 days old) Fh samples that were synthesized and aged in four combinations of aerobic and anaerobic environments. (e) Measure of CO<sub>2</sub> incorporation for the four combinations of aerobic and anaerobic environments.



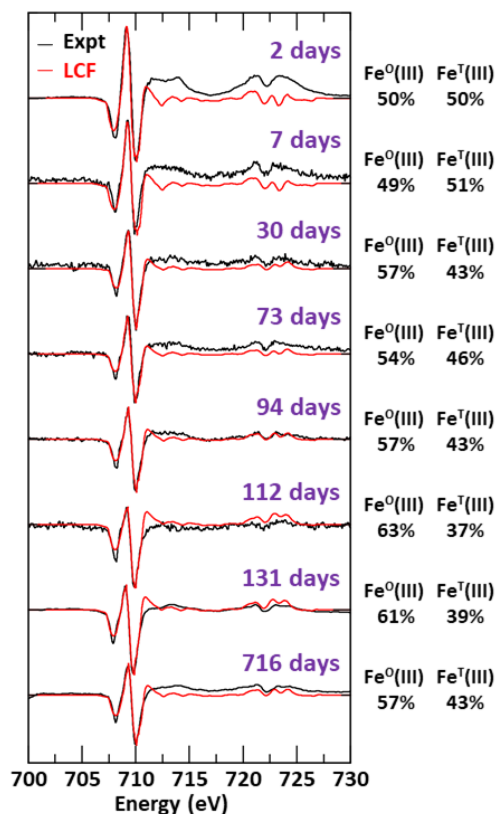

**Figure S9:** Linear combination fits (LCF) of experimental Fe  $L_{2,3}$ -edges XMCD spectra of Fh samples synthesized in aerobic and aged in anaerobic conditions as function of time. The linear combination fits used two ligand field multiplets calculated Fe(III) components, octahedral and tetrahedral, labelled as  $Fe^0(III)$  and  $Fe^T(III)$  respectively.

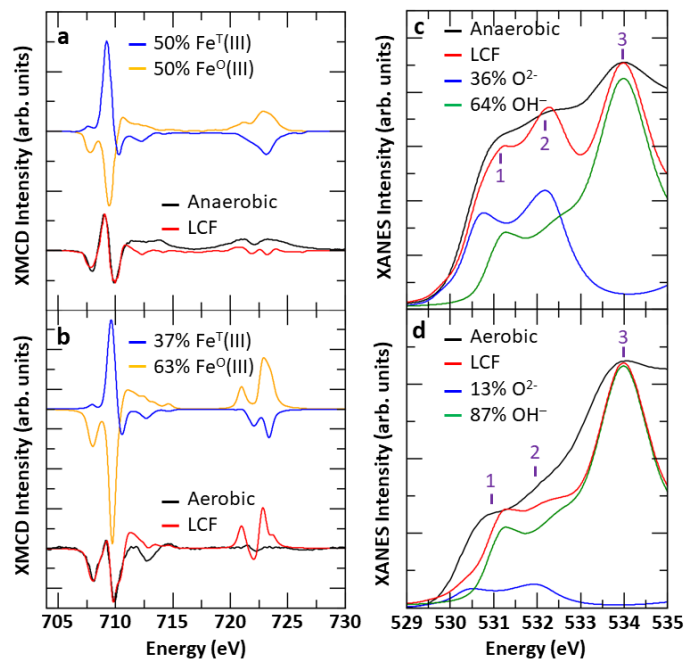

**Figure S10:** Linear combination fits (LCF) of (a, b) Fe  $L_{2,3}$ -edges XMCD and (c, d) O K-edge XANES of fresh Fh samples synthesized in aerobic conditions and aged in (a, c) anaerobic and (b, d) aerobic conditions.

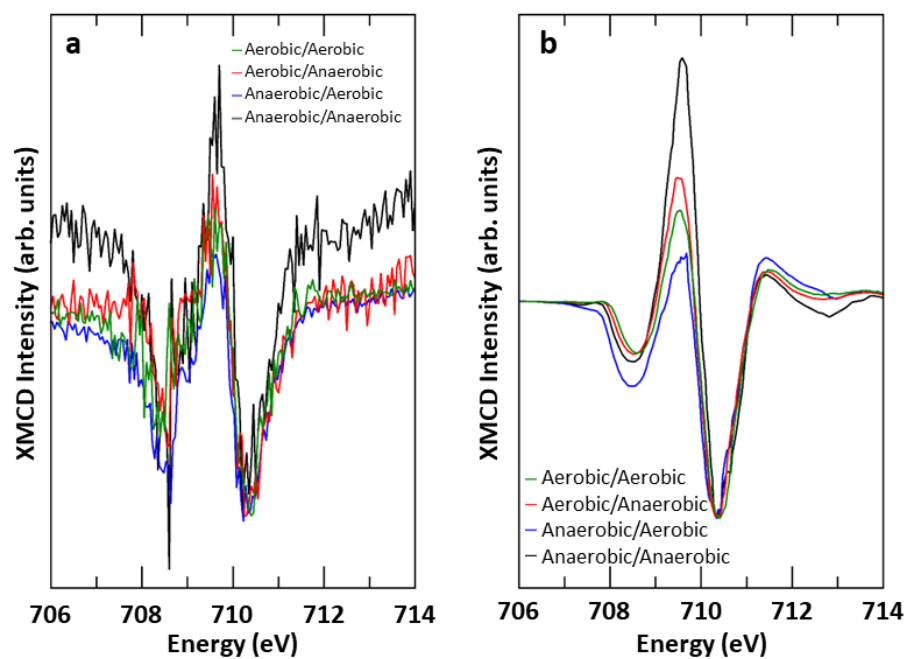

**Figure S11:** (a) Experimental Fe L-edge XMCD spectra and (b) corresponding linear combination fits for fresh (2 days old) Fh samples synthesized in either aerobic and anaerobic conditions and aged in either aerobic and anaerobic conditions.

**References:**

1. Dzombak, D. A.; Morel, F. M. M. Surface Complexation Modeling: Hydrous Ferric Oxide. *John Wiley & Sons: New York* **1990**, p 393.
2. Zachara, J. M.; Girvin, D. C.; Schmidt, R. L.; Resch, C. T. Chromate adsorption on amorphous iron oxyhydroxide in the presence of major groundwater ions. *Environ. Sci. Technol.* **1987**, *21*, 589-594.
3. Appelo, C. A. J.; Van der Weiden, M. J. J.; Tournassat, C.; Charlet, L. Surface complexation of ferrous iron and carbonate on ferrihydrite and the mobilization of arsenic. *Environ. Sci. Technol.* **2002**, *36*, 3096-3103.
